# Supplementary material for: Large scale integration of drug-target information reveals poly-pharmacological drug action mechanisms in tumor cell line growth inhibition assays
Source: PubMed Central journal article supplement (PMC3996666; doi:10.18632/oncotarget.1597), 2014-01-21
Supplement: oncotarget-05-0659-s001.pdf [file oncotarget-05-0659-s001.pdf]

### Supplementary material for “Large scale integration of drug-target information reveals poly-pharmacological drug action mechanisms in tumor cell line growth inhibition assays”

By examining PubChem BioAssay and DrugBank data repositories, we were able to collect experimentally detected protein targets for these molecules. Up to 200 000 molecules have at least one target, either known from the literature or found to inhibit/activate the protein in target oriented screening assays. More than 50 000 molecules were known to target at least 5 proteins. In total, more than 1500 proteins are covered (at least one molecule is known to target the protein). This large scale molecule-to-target information is next used to explore potential therapeutic mechanisms of tumour cytotoxicity in tumor growth inhibition assays.

Table S1 provides statistics related to the top proteins in terms of the number of molecules known to target them (for molecules tested in the cancer assays from Table 1). In total, 1595 genes are covered (i.e. at least one molecule is known to target one gene product). For 352 genes at least 50 molecules were experimentally found to target its gene product.

Here we provide additional results similar to results presented in the main paper but for other tumor cell line growth inhibition assays. The aim is to demonstrate that nevertheless for each assay the top enriched targets and multi-target enriched patterns varied, the structure of the patterns is the same: odds ratios for individual protein targets are varied from 10 up to 70 folds. Considering pairs of targets increase odds up to 30–150 fold. Considering triplets may result in increase of odds up to 500 folds. Similar, for each enriched single protein target, filtering out molecules that also target multi-target patterns (partners of the protein of interest) results in no observed increase of odds ratio for molecules to be efficient inhibitors of tumor cell line growth.

### Inference of Therapeutic models of cancer cytotoxicity

Our goal is to understand the molecular mechanisms of cancer cytotoxicity in terms of protein targets whose inhibition leads to increased chances that the molecule would be cytotoxic. As a first step, we search for single protein targets overrepresented among active molecules (versus inactive molecules). Next we refer to such proteins as “enriched proteins” and the odds ratio is used as a quantitative measure of enrichment<sup>12</sup>. The odds ratio compares the odds for molecules to be cytotoxic which target the protein of interest with the odds for molecules which do not. Statistical significance is computed using X<sup>2</sup> distribution and, next, is adjusted for multiple testing (each target corresponds to one hypothesis, see methods for details).

We also look for patterns of multiple proteins (i.e. protein “A” and “B”) which, if being targeted by a molecule, significantly increase the odds (observed in the assay) for the molecule to be cytotoxic in comparison to the odds related to each individual protein from the multi-target pattern. Thus we end up with the patterns consisting of several proteins which mark a subset of molecules (each molecule is known to target each protein from the pattern) with a highly significant proportion of them exhibiting cancer cytotoxicity in the assay. We refer to such patterns as the “poly-pharmacology therapeutic model” of cancer cytotoxicity.

#### In the tables below:

kA - The number of active molecules known to target gene/pattern

KA - The total number of active molecules ( $IC_{50} < 10^{-6}$ )

kB - The number of inactive molecules known to target gene/pattern

KB - The total number of inactive molecules in the assay ( $IC_{50} > 10^{-6}$ )

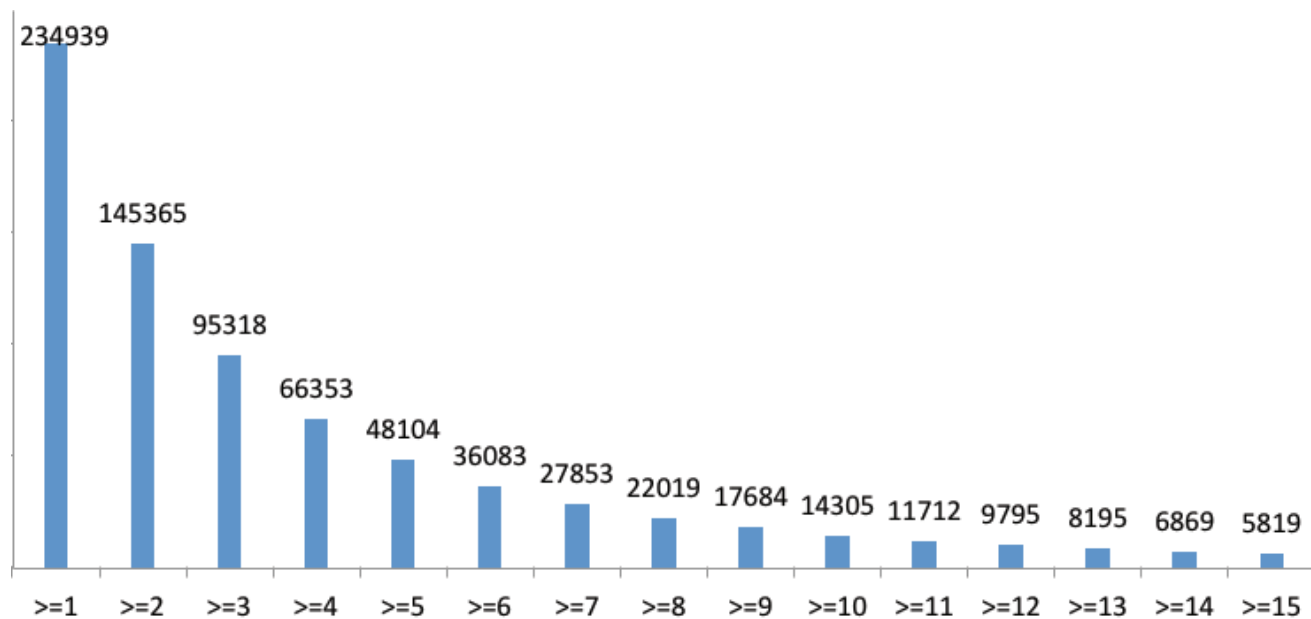

**Figure S1:** Distribution of the number of experimentally detected targets for ~ 500 000 molecules tested in cancer cell line inhibition assays from Table 1.

**Table S1: Top 10 proteins in terms of the number of molecules experimentally validated to target them**

| Target  | The number of molecules |
|---------|-------------------------|
| TDP1    | 58 862                  |
| EHMT2   | 29 085                  |
| CYP2C19 | 20 849                  |
| CYP2C9  | 20 635                  |
| ALDH1A1 | 15 488                  |
| BAZ2B   | 14 399                  |
| GMNN    | 13 360                  |
| DRD1    | 12 831                  |
| ATAD5   | 12 097                  |
| DRD3    | 11 263                  |

Data for “Luminescence Cell-Based Primary HTS to Identify Inhibitors of Cancer Stem Cells”

**Table S2: Top individual targets enriched among molecules producing cytotoxic effect in “Luminescence Cell-Based Primary HTS to Identify Inhibitors of Cancer Stem Cells”**

| #  | Target (Gene) | P-value FDR adjusted | Odds Ratio | kA   | KA   | kB    | KB     |
|----|---------------|----------------------|------------|------|------|-------|--------|
| 1  | MITF          | 1.00e-300            | 27.1       | 569  | 3100 | 1586  | 192912 |
| 2  | GMNN          | 1.00e-300            | 10.3       | 1120 | 3100 | 9998  | 192912 |
| 3  | IDH1          | 1.00e-300            | 17.1       | 803  | 3100 | 3865  | 192912 |
| 4  | SMAD3         | 1.00e-300            | 16.8       | 527  | 3100 | 2325  | 192912 |
| 5  | ATXN2         | 1.00e-300            | 26.0       | 525  | 3100 | 1500  | 192912 |
| 6  | EPAS1         | 1.00e-300            | 21.4       | 440  | 3100 | 1480  | 192912 |
| 7  | CFTR          | 1.00e-300            | 18.7       | 549  | 3100 | 2200  | 192912 |
| 8  | TDP1          | 1.00e-300            | 7.3        | 2082 | 3100 | 42111 | 192912 |
| 9  | PAX8          | 8.98e-268            | 17.6       | 348  | 3100 | 1378  | 192912 |
| 10 | NOD1          | 6.94e-247            | 12.1       | 390  | 3100 | 2262  | 192912 |

**Table S3: Poly-pharmacology of molecules targeting EPAS1 in “Luminescence Cell-Based Primary HTS to Identify Inhibitors of Cancer Stem Cells”**

| Target(Gene/<br>pattern)    | P-value FDR<br>adjusted | Odds Ratio  | kA  | KA   | kB   | KB     |
|-----------------------------|-------------------------|-------------|-----|------|------|--------|
| EPAS1                       | 1.00e-300               | <b>21.4</b> | 440 | 3100 | 1480 | 192912 |
| MC4R                        | 1.00e-141               | <b>6.3</b>  | 350 | 3100 | 3825 | 192912 |
| CHRM4                       | 4.11e-53                | <b>4.0</b>  | 199 | 3100 | 3264 | 192912 |
| EPAS1 and MC4R              | 2.47e-168               | <b>70.2</b> | 137 | 3100 | 127  | 192912 |
| EPAS1 and CHRM4             | 2.02e-95                | <b>76.9</b> | 76  | 3100 | 63   | 192912 |
| CHRM4 and EPAS1<br>and MC4R | 1.83e-53                | <b>145</b>  | 39  | 3100 | 17   | 192912 |

**Table S4: After filtering out molecules which target EPAS1 and either “TDP1, CFTR, GMNN, PPP1CA” we see no increase in odds for molecules which target only “EPAS1” to produce cytotoxic effect in assay “Luminescence Cell-Based Primary HTS to Identify Inhibitors of Cancer Stem Cells”**

| Target(Gene/pattern)                     | P-value<br>FDR<br>adjusted | Odds Ratio  | kA  | KA   | kB   | KB     |
|------------------------------------------|----------------------------|-------------|-----|------|------|--------|
| EPAS1                                    | 1.00e-300                  | <b>21.4</b> | 440 | 3100 | 1480 | 192912 |
| EPAS1<br>not<br>TDP1, CFTR, GMNN, PPP1CA | 0.99                       | <b>1.6</b>  | 16  | 2676 | 629  | 192061 |

Data for “HTS Cytotoxicity/Cell viability assay (HPDE-C7K cells)”

**Table S5: Top individual targets enriched among molecules producing cytotoxic effect in “HTS Cytotoxicity/Cell viability assay (HPDE-C7K cells)”**

| #  | Target (Gene) | P-value FDR adjusted | Odds Ratio | kA  | KA   | kB   | KB    |
|----|---------------|----------------------|------------|-----|------|------|-------|
| 1  | GMNN          | 1.21e-260            | 18.7       | 361 | 1032 | 1254 | 44778 |
| 2  | TDP1          | 9.35e-243            | 9.0        | 642 | 1032 | 6947 | 44778 |
| 3  | IDH1          | 8.53e-211            | 29.0       | 234 | 1032 | 448  | 44778 |
| 4  | JAK2          | 4.12e-141            | 25.5       | 162 | 1032 | 324  | 44778 |
| 5  | HTR1E         | 5.86e-124            | 12.5       | 200 | 1032 | 844  | 44778 |
| 6  | TUBB          | 2.61e-105            | 20.2       | 132 | 1032 | 323  | 44778 |
| 7  | APP           | 1.50e-95             | 11.8       | 157 | 1032 | 670  | 44778 |
| 8  | HTR1A         | 8.52e-92             | 12.1       | 148 | 1032 | 609  | 44778 |
| 9  | CFTR          | 3.03e-87             | 22.4       | 104 | 1032 | 223  | 44778 |
| 10 | CTNNB1        | 4.08e-87             | 44.9       | 82  | 1032 | 86   | 44778 |

**Table S6: Poly-pharmacology of molecules targeting IDH1 in “HTS Cytotoxicity/Cell viability assay (HPDE-C7K cells)”**

| Target(Gene/<br>pattern)      | P-value FDR<br>adjusted | Odds Ratio  | kA  | KA   | kB   | KB    |
|-------------------------------|-------------------------|-------------|-----|------|------|-------|
| IDH1                          | 8.53e-211               | <b>29.0</b> | 234 | 1032 | 448  | 44778 |
| GMNN                          | 1.21e-260               | <b>18.7</b> | 361 | 1032 | 1254 | 44778 |
| MMP14                         | 2.70e-61                | <b>13.9</b> | 90  | 1032 | 306  | 44778 |
| IDH1 and<br>GMNN              | 6.38e-143               | <b>49.7</b> | 134 | 1032 | 134  | 44778 |
| IDH1 and<br>MMP14             | 7.25e-57                | <b>63.3</b> | 50  | 1032 | 36   | 44778 |
| MMP14 and<br>IDH1 and<br>GMNN | 1.83e-53                | <b>127</b>  | 34  | 1032 | 12   | 44778 |



**Table S7: After filtering out molecules which target IDH1 and either “TDP1,CYP2C9,CHRM4, HTR1E” we see no increase in odds for molecules which target only “IDH1” to produce cytotoxic effect in assay “HTS Cytotoxicity/Cell viability assay (HPDE-C7K cells)”**

| Target(Gene/pattern)                      | P-value<br>FDR<br>adjusted | Odds Ratio  | kA  | KA   | kB  | KB    |
|-------------------------------------------|----------------------------|-------------|-----|------|-----|-------|
| IDH1                                      | 8.53e-211                  | <b>29.0</b> | 234 | 1032 | 448 | 44778 |
| IDH1<br>not<br>TDP1, CYP2C9, CHRM4, HTR1E | 0.99                       | <b>1.8</b>  | 3   | 801  | 95  | 44425 |
